27. Nouette-Gaulain K, Bellance N, Prévost B, Passerieux E, Pertuiset C, Galbes O, Smolkova K, Masson F, Miraux S, Delage JP, Letellier T, Rossignol R, Capdevila X, Sztark F: Erythropoietin protects against local anesthetic myotoxicity during continuous regional analgesia. *ANESTHESIOLOGY* 2009; 110:648–59
28. Maemura Y: Effect of ropivacaine on Ca function of skinned skeletal muscle. *Masui* 2002; 51:19–24
29. Viner RI, Ferrington DA, Williams TD, Bigelow DJ, Schöneich C: Protein modification during biological aging: Selective tyrosine nitration of the SERCA2a isoform of the sarcoplasmic reticulum  $\text{Ca}^{2+}$ -ATPase in skeletal muscle. *Biochem J* 1999; 340:657–69
30. Xu KY, Huso DL, Dawson TM, Bredt DS, Becker LC: Nitric oxide synthase in cardiac sarcoplasmic reticulum. *Proc Natl Acad Sci U S A* 1999; 96:657–62
31. Xu L, Eu JP, Meissner G, Stamler JS: Activation of the cardiac calcium release channel (ryanodine receptor) by poly-S-nitrosylation. *Science* 1998; 279:234–7
32. Park CJ, Park SA, Yoon TG, Lee SJ, Yum KW, Kim HJ: Bupivacaine induces apoptosis *via* ROS in the Schwann cell line. *J Dent Res* 2005; 84:852–7
33. Rosencher N, Poisson D, Albi A, Aperce M, Barré J, Samama CM: Two injections of erythropoietin correct moderate anemia in most patients awaiting orthopedic surgery. *Can J Anaesth* 2005; 52:160–5

## ANESTHESIOLOGY REFLECTIONS

### A “French” Charrière Ether Inhaler

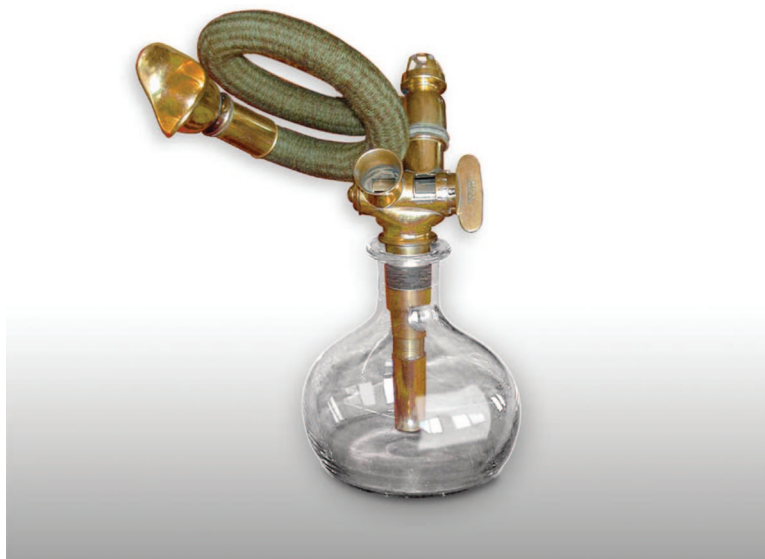

When surgeons request 36-French (12 mm-diameter) chest tubes, the term “French” honors the originator of that sizing system, Joseph-Frédéric-Benoît Charrière, a Parisian manufacturer of surgical instruments. By 1847, Charrière’s firm had generated brass-and-glass inhalers for etherizing and later chloroforming patients. Sharing the glass-and-brass design flaws of the original 1846 Morton ether inhaler, Charrière inhalers’ volatile contents chilled progressively, leading to inefficient vaporizing and patients’ early emergence from anesthesia. Curatorial donations of travel costs and of the inhaler itself (see above) expedited hand-carrying this “French” Charrière Ether Inhaler aboard jets from Montpellier to Chicago *via* London. (Copyright © the American Society of Anesthesiologists, Inc. This image appears in color in the *Anesthesiology Reflections* online collection available at [www.anesthesiology.org](http://www.anesthesiology.org).)

George S. Bause, M.D., M.P.H., Honorary Curator, ASA’s Wood Library-Museum of Anesthesiology, Park Ridge, Illinois, and Clinical Associate Professor, Case Western Reserve University, Cleveland, Ohio. [UJYC@aol.com](mailto:UJYC@aol.com).
